# Supplementary material for: Fluoride-induced headkidney macrophage cell apoptosis involves activation of the CaMKIIg-ERK 1/2-caspase-8 axis: the role of superoxide in initiating the apoptotic cascade
Source: Royal Society of Chemistry journal article supplement (doi:10.1039/c6tx00206d), 2016-01-01
Supplement: c6tx00206d1.pdf [file c6tx00206d1.pdf]

## Fluoride-induced headkidney macrophage cell apoptosis involves activation of CaMKII $\beta$ -ERK 1/2-Caspase-8 axis: role of superoxide in initiating the apoptotic cascade

Rashmi Singh<sup>a</sup>, Chaitali Banerjee<sup>a</sup>, Atish Ray<sup>a</sup>, Paulraj Rajamani<sup>b</sup> and Shibnath Mazumder<sup>\*a</sup>

<sup>a</sup>Immunobiology Laboratory, Department of Zoology, University of Delhi, Delhi 110 007, India.

<sup>b</sup>School of Environmental Sciences, Jawaharlal Nehru University, Delhi, India.

**\*Address for correspondence: Shibnath Mazumder**, Immunobiology Laboratory, Department of Zoology, University of Delhi, Delhi 110 007, India. Tel & Fax: 91-11-27667985; E-mail: shibnath1@yahoo.co.in

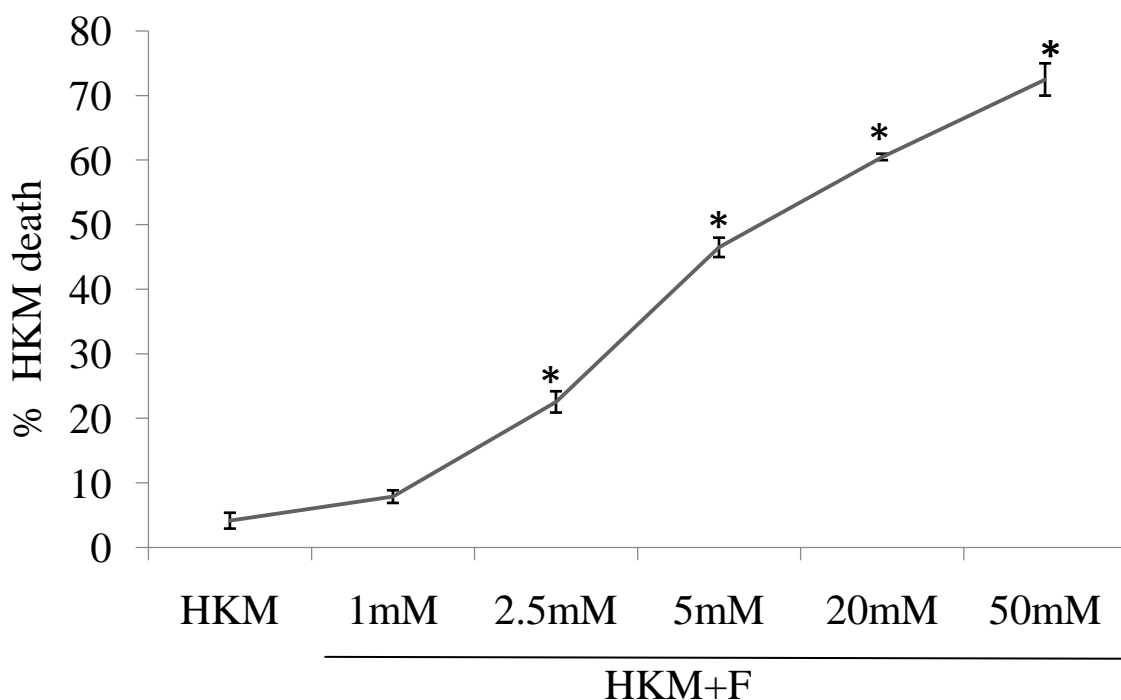

**Fig. S1 Fluoride induces dose dependent HKM cell cytotoxicity.** HKM cells were exposed to indicated concentration of fluoride for 24 h and percentage cell death scored with trypan blue dye exclusion test (0.4%). Vertical bars represent mean  $\pm$  SE (n = 3; p < 0.05). \*P < 0.05, compared to HKM cells. HKM, control headkidney macrophage cells; HKM + F, HKM cells exposed to fluoride.
